# Supplementary material
Source: publisher site journal article supplement (https://www.e-cmh.org/upload/media/cmh-2022-0327-Supplementary-Fig-5.pdf)
Supplement: Supplementary file 1 [file cmh-2022-0327-Supplementary-Fig-5.pdf]

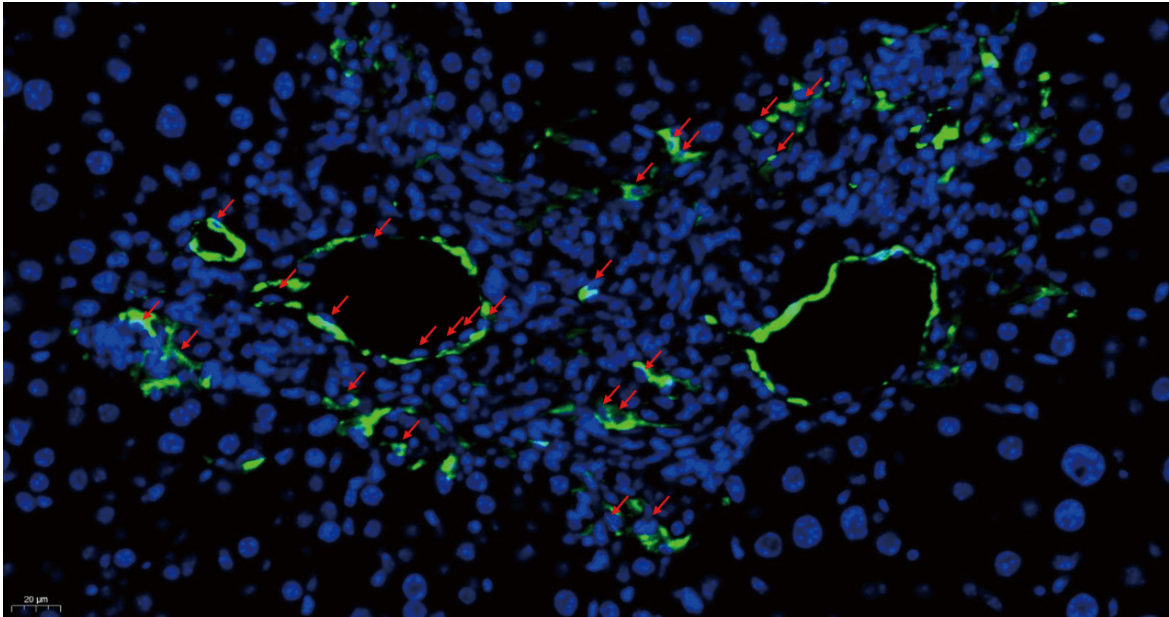

**Supplementary Figure 5.** Immunofluorescence staining showing hepatic  $\alpha$ -SMA expression (nuclei indicated by the red arrows).  $\alpha$ -SMA,  $\alpha$ -smooth muscle actin.
